# Supplementary material
Source: Research Square preprint supplement (doi:10.21203/rs.3.rs-9935502/v1)
Supplement: Supplementary file 1 [file a76ec4d6e513fb19efe17cf6.docx]

**Supplemental Material for**

**Angle-resolved multiphoton free-free transitions of ultrafast electrons**

Changying Li1†, Danni Chen1†, Yiming Pan1,2

1 *School of Physical Science and Technology, ShanghaiTech University, Shanghai 201210, China*

2 *State Key Laboratory of Quantum Functional Materials and Center for Transformative Science, ShanghaiTech University, Shanghai 201210, China*

This Supplemental Material provides the technical details supporting the photonic-crystal-mediated ARMFFT framework in the main text.

- Section S1 defines the coupling-efficiency framework for optical injection and conversion into a selected PhC spatial harmonic.
- Section S2 describes the PhC design and optimization used to enhance high-order Bloch harmonics near the band edge.
- Section S3 derives the coupled-mode equation for multiphoton sideband dynamics.
- Section S4 analyzes how external parameters control the cutoff-limited EELS and the effective dimension of the observable synthetic momentum lattice.

S1. Design strategy for the first phase-matching process in ARMFFT

The first phase-matching step converts incident optical energy into a selected high-order spatial harmonic of the PhC. This harmonic supplies the longitudinal momentum required to match the velocity of slow electrons and therefore sets the strength of the subsequent electron-light interaction. We quantify this process with a coupling efficiency , evaluated from experimentally relevant quantities such as optical power or the longitudinal electric-field intensity associated with the selected harmonic. The total efficiency can be separated into two factors:
Here, is the optical-injection efficiency, namely the efficiency for coupling external light into the integrated photonic platform, whereas is the PhC harmonic-conversion efficiency, namely the efficiency for transferring the on-chip field into the selected spatial harmonic. Eq. (S1) separates these two physical bottlenecks and motivates two optimization routes: optimize and independently, or optimize the total efficiency in a global co-design.

**(1) Separated optimization route**

In the separated optimization route, optical injection and PhC harmonic conversion are treated as two linked but individually optimizable steps. First, light is coupled into the integrated photonic platform using a high- coupler, such as a grating coupler, edge coupler, prism coupler, or fiber-based coupler, and is then delivered to the PhC through an intermediate modulator. The PhC geometry is then optimized to enhance . Together, the two steps increase the overall coupling efficiency . When the intermediate element is minimized or omitted, efficient transfer can instead be maintained through a closely matched coupler-PhC interface.

As a simple implementation of this separated strategy, consider a tailored PhC with period seamlessly connected to a grating coupler with pitch . A free-space laser with angular frequency and incidence angle relative to the vertical y direction serves as the excitation source. Efficient momentum matching among the incident field, grating coupler, and selected PhC harmonic is obtained when
where is the free-space wave number, and and are integers. Under this condition, the injected optical field is phase-matched to the -th spatial harmonic of the PhC, thereby increasing . Using an apodized grating coupler and choosing = 1 can further improve and hence the total efficiency . Thus, when the system can be decomposed into a light-injection part and a PhC interaction part, the optimization can be organized as two coupled but practically separable design tasks.

**(2) Global co-design route**

A more general strategy is to optimize the optical coupler and PhC as a single integrated structure. In this global route, the geometric parameters of both components are combined into one design vector and optimized against a chosen performance metric (for example, the field amplitude in the selected spatial harmonic). Inverse design, particle-swarm optimization, or related numerical methods can then be used to maximize this metric. Such co-design may improve overall efficiency, but it requires substantially larger computational resources and is not necessary for establishing the ARMFFT mechanism considered here.

**(3) Our design**

In the main text, we adopt the separated two-step strategy: (i) a coupler injects free-space light into an integrated optical waveguide, corresponding to , and (ii) the guided mode enters the PhC and excites high-order spatial harmonics, corresponding to . Since integrated-photonic couplers can already provide substantial injection efficiency, optical injection into the waveguide is not the focus of this work, where representative coupling approaches are discussed in the literature [Phys. Rev. Applied 25, 014078 (2026); Appl. Sci. 10, 1538 (2020); Micromachines 11, 666 (2020); J. Lightwave Technol. 38, 4435-4446 (2020)]. The optimization below therefore focuses on increasing .

S2. Photonic-crystal design and optimization

High-order spatial harmonics in a PhC can have low phase velocities and therefore provide natural channels for velocity matching with slow electrons. Bloch modes near a PhC band edge also exhibit reduced group velocity and enhanced local-field intensity, which increase the interaction time and electron-photon coupling strength. The design goal is therefore to transfer optical energy from the guided waveguide mode into high-order spatial harmonics near the band edge, where the field can simultaneously satisfy phase matching and provide a sufficiently strong longitudinal modulation.

To design the PhC while keeping the calculation tractable, we use a Bloch-theorem-based formulation of Maxwell's equations and analyze the eigenmodes of the periodic structure. This leads to the plane-wave expansion method (PWEM), a standard approach for calculating photonic band structures and Bloch-mode profiles in periodic media [Opt. Express 8, 173-190 (2001); J. Opt. Soc. Am. A 21, 1769-1775 (2004); Chin. Phys. Lett. 28, 034209 (2011)].

For a resonant wave with angular frequency , , Maxwell's curl equations are
where and are the relative permittivity and relative permeability of the periodic structure, respectively. Combining the two equations and eliminating the electric-field component gives
In a PhC, and are periodic functions: , , where is the spatial period of the structure. Therefore, we can expand and into Fourier series using reciprocal lattice vectors :
Here, and are Fourier coefficients obtained from the Fourier transforms of and ; is a reciprocal lattice vector satisfying ; are the reciprocal basis vectors. According to Bloch's theorem, the eigenfield can be expanded as
where is the Bloch wave vector. Substitution into the wave equation gives the following plane-wave matrix equation for a three-dimensional PhC:
Eq. (S7) reduces the band-structure calculation to an eigenvalue problem: For given material Fourier coefficients and , solving this matrix equation at each Bloch wave vector gives the corresponding eigenfrequencies , yielding the dispersion relation and the Bloch-field distribution

For the one-dimensional PhC composed of non-magnetic media considered here, , , , and . In the waveguide-integrated geometry shown in Figure 1 of the main text, the optical field has propagation degrees of freedom only in the *xz*-plane and is confined along the *y*-direction. The Bloch wavevector can therefore be written as , and Eq. (S7) reduces to
For normal incidence, . The one-dimensional PhC thus acts as a platform for coupling spatial harmonics: an optical-field harmonic with spatial frequency couples to a dielectric harmonic with spatial frequency , coherently generating a new optical-field harmonic with spatial frequency . The coefficient determines the coupling strength between harmonics. As shown in Figure S1, when the coupling is weak, the off-diagonal elements of the coefficient matrix are small and the PhC dispersion approaches that of a homogeneous medium. As the coupling increases, the off-diagonal elements of become more important and the dispersion deviates more strongly from the homogeneous-medium model. Sufficient coupling among spatial harmonics is therefore required to place appreciable energy in high-order modes; equivalently, the periodic structure must impose a strong spatial modulation on the optical field.

The bandgap width provides an effective measure of the modulation strength. A wider bandgap indicates that the Bloch mode deviates more strongly from a single sinusoidal wave and that the spatial field profile contains stronger non-sinusoidal components. This structural perturbation transfers optical energy from the fundamental component into high-order harmonics ( = 2, 3, ...), enabling slow electrons to interact with a phase-matched longitudinal field component.

We design a silicon PhC on a 220-nm SOI platform, with a silica lower cladding and a vacuum upper cladding that leaves space for electron-photon interaction above the device. In the simulation, the bandgap width at the first-Brillouin-zone edge () is used as the optimization target. The TM-polarized fundamental waveguide mode (with a substantial electric field component in longitudinal direction) is taken as the excitation source, and the period and duty cycle (where is the silicon ridge width) are scanned, as shown in Figure S1(b). After structural optimization, the operating frequency is chosen near the band edge, in Figure S1(a), corresponding to an excitation wavelength of 868.7 nm in the second band. Considering possible numerical uncertainty, we use 866.5 nm as the working wavelength.

This band-edge region offers two advantages. First, the reduced group velocity increases the effective interaction time between the electron and optical field. Second, the strong Bragg-scattering regime creates a standing-wave-like Bloch field through interference between forward and backward components. As a result, the complex amplitude of the selected high-order harmonic is enhanced.

We verify this design strategy with finite-difference time-domain (FDTD) simulations of the Bloch-mode field distribution near the band edge. A spatial Fourier transform of the longitudinal field sampled along the center line (*x* = 0) of the structure surface yields the harmonic amplitudes shown in Figure S1(d). Under TM-polarized waveguide-mode excitation, the 1st through 4th high-order harmonics are strongly enhanced in addition to the fundamental 0th-order component. This confirms that the designed PhC satisfies the slow-electron phase-matching condition and provides a sufficiently strong longitudinal modulation field . Combining a large-bandgap geometry with band-edge operation therefore enhances the electron-modulation efficiency while maintaining momentum matching on the integrated photonic platform.





Figure S1 | Photonic-crystal design and harmonic-content optimization. (a) Band structure of the one-dimensional PhC in the first Brillouin zone, showing the band-edge operating region used to enhance the interaction. (b) Bandgap width as a function of PhC period and duty cycle, used as the optimization metric for strong spatial modulation. (c) Simulated Bloch-mode field profile near the band edge. (d) Fourier amplitudes of the spatial harmonics extracted from the near-field distribution, confirming enhanced high-order components for slow-electron phase matching.

S3. Detailed derivation of the coupled-mode equation

We start from the relativistic Klein-Gordon equation with minimal coupling, corresponding to Eq. (5) in the main text:
The electron state is expanded as
where the wave-vector component and the energy obey the energy-momentum conservation relations. Substituting the ansatz in Eq. (S10) into the minimally coupled Klein-Gordon equation, Eq. (S9), and neglecting boundary effects along the y direction, we obtain:

To simplify the dynamical equation, we use two approximations. (1) Under the slowly varying envelope approximation, the scattered-wave envelope changes on a length scale much larger than the optical-period oscillation, as indicated by Figure S1(c). Thus . (2) Under the quasi-classical approximation, the de Broglie wavelength of the relativistic electrons considered here is tens of picometers, much smaller than the PhC period, so . Retaining only the leading envelope terms gives:
Again, from Eq. (S12), two additional simplifications are made. First, the ponderomotive term associated with is neglected since it contributes only a weak higher-order correction under the weak-coupling conditions considered here. Second, the optical near field is taken to vary primarily along *z* and does not introduce an *x*-dependent modulation, so the transverse envelope term is omitted. The equation then reduces to
Using Euler's formula and the energy-momentum relations , the equation becomes
Applying the inverse Fourier transform and its orthogonality relation , we can derive the coupled-mode equation governing probability transfer between adjacent energy orders:
and its simplified form:
Here, and are the coupling coefficients between modes, representing the probability amplitudes for scattering from the (n - 1)-th or (n + 1)-th momentum state into the n-th momentum state:
This expression is the detailed form underlying Eq. (7) in the main text.

S4. External-parameter control of cutoff-limited EELS

In the main text, the far-field EELS cutoff is shown to depend on the electron velocity and incidence angle . External parameters provide an additional, experimentally accessible control axis. The main-text Figure 3 uses = 0.07° and longitudinal field amplitude = 50 MV/m, corresponding to 57.3 nm. Figure S2 instead uses = 0.04° and = 10 MV/m, corresponding to 286.4 nm. Comparing these two cases shows how the incidence angle shifts the cutoff boundary, while the optical field amplitude rescales the physical interaction length required to reach a given normalized coupling strength.





Figure S2 | External-parameter control of cutoff-limited EELS. z-dependent EELS evolution for electrons interacting with the 0th, 1st, and 2nd spatial harmonics under phase-matching conditions. Compared with the main-text parameters in Figure 3, this case uses a smaller incidence angle and weaker optical field, shifting the cutoff location and increasing the physical interaction length associated with the same normalized coupling strength. Parameters: optical wavelength 866.5 nm, electric-field intensity E = 10 MV/m, electron incidence angle 0.04°, and 286.4 nm.

Although the coherent transition rate between adjacent photon orders is governed by the normalized interaction length , the attenuation of sidebands beyond the cutoff is controlled by the actual physical propagation length. In the normalized representation, a weaker optical field can appear to produce stronger attenuation because the same normalized length corresponds to a longer real-space interaction distance. Before the sideband distribution reaches the cutoff boundary, the EELS evolution remains close to the unbounded PINEM-like quantum walk. Once the boundary is reached, the spectrum becomes cutoff-limited, illustrating how external parameters control the effective dimension of the detectable synthetic momentum space.
